# Supplementary material for: Estimating the soil N 2 O emission intensity of croplands in northwest Europe
Source: Copernicus journal article supplement (doi:10.5194/bg-16-1641-2019), 2019-04-18
Supplement: Supplementary file 1 [file bg-16-1641-2019-supplement.pdf]

Supplement of Biogeosciences, 16, 1641–1655, 2019  
<https://doi.org/10.5194/bg-16-1641-2019-supplement>  
© Author(s) 2019. This work is distributed under  
the Creative Commons Attribution 4.0 License.

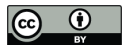

*Supplement of*

## **Estimating the soil N<sub>2</sub>O emission intensity of croplands in northwest Europe**

**Vasileios Myrgiotis et al.**

*Correspondence to:* Vasileios Myrgiotis (v.myrgiotis@ed.ac.uk)

The copyright of individual parts of the supplement might differ from the CC BY 4.0 License.

**Table S1.** Details of the dates (julian day) of management activities (harvest, tillage, planting) and fertiliser application used in the simulations.

| Soil Type | Location | Crop | Tillage      | Planting     | Fertiliser | Splits | Fertiliser Date 1 | Fertiliser Amount 1 | Fertiliser Date 2 | Fertiliser Amount 2 | Fertiliser Date 3 | Fertiliser Amount 3 | Harvest      |
|-----------|----------|------|--------------|--------------|------------|--------|-------------------|---------------------|-------------------|---------------------|-------------------|---------------------|--------------|
|           |          |      | (julian day) | (julian day) | (kgNha-1)  |        | (julian day)      | (kgNha-1)           | (julian day)      | (kgNha-1)           | (julian day)      | (kgNha-1)           | (julian day) |
| SANDS     | south    | SB   | 91           | 94           | 150        | 2      | 96                | 75                  | 126               | 75                  | -                 | -                   | 238          |
|           |          | WB   | 285          | 288          | 200        | 2      | 57                | 40                  | 88                | 160                 | -                 | -                   | 211          |
|           |          | WW   | 285          | 288          | 220        | 3      | 74                | 40                  | 102               | 90                  | 130               | 90                  | 250          |
|           |          | WOSR | 212          | 215          | 210        | 2      | 58                | 105                 | 86                | 105                 | -                 | -                   | 210          |
|           | north    | SB   | 75           | 78           | 150        | 2      | 80                | 75                  | 110               | 75                  | -                 | -                   | 258          |
|           |          | WB   | 285          | 288          | 200        | 2      | 57                | 40                  | 88                | 160                 | -                 | -                   | 211          |
|           |          | WW   | 285          | 288          | 220        | 3      | 84                | 40                  | 112               | 90                  | 140               | 90                  | 270          |
|           |          | WOSR | 212          | 215          | 210        | 2      | 58                | 105                 | 86                | 105                 | -                 | -                   | 210          |
| OTHER     | south    | SB   | 91           | 94           | 130        | 2      | 96                | 65                  | 126               | 65                  | -                 | -                   | 238          |
|           |          | WB   | 285          | 288          | 180        | 2      | 57                | 40                  | 88                | 140                 | -                 | -                   | 211          |
|           |          | WW   | 285          | 288          | 200        | 3      | 74                | 40                  | 102               | 80                  | 130               | 80                  | 250          |
|           |          | WOSR | 212          | 215          | 210        | 2      | 58                | 105                 | 86                | 105                 | -                 | -                   | 210          |
|           | north    | SB   | 75           | 78           | 130        | 2      | 80                | 65                  | 110               | 65                  | -                 | -                   | 258          |
|           |          | WB   | 285          | 288          | 180        | 2      | 57                | 40                  | 88                | 140                 | -                 | -                   | 211          |
|           |          | WW   | 285          | 288          | 200        | 3      | 84                | 40                  | 112               | 80                  | 140               | 80                  | 270          |
|           |          | WOSR | 212          | 215          | 210        | 2      | 58                | 105                 | 86                | 105                 | -                 | -                   | 210          |
| SALO      | south    | SB   | 91           | 94           | 130        | 2      | 96                | 65                  | 126               | 65                  | -                 | -                   | 238          |
|           |          | WB   | 285          | 288          | 180        | 2      | 57                | 40                  | 88                | 140                 | -                 | -                   | 211          |
|           |          | WW   | 285          | 288          | 200        | 3      | 74                | 40                  | 102               | 80                  | 130               | 80                  | 250          |
|           |          | WOSR | 212          | 215          | 210        | 2      | 58                | 105                 | 86                | 105                 | -                 | -                   | 210          |
|           | north    | SB   | 75           | 78           | 130        | 2      | 80                | 65                  | 110               | 65                  | -                 | -                   | 258          |
|           |          | WB   | 285          | 288          | 180        | 2      | 57                | 40                  | 88                | 140                 | -                 | -                   | 211          |
|           |          | WW   | 285          | 288          | 200        | 3      | 84                | 40                  | 112               | 80                  | 140               | 80                  | 270          |
|           |          | WOSR | 212          | 215          | 210        | 2      | 58                | 105                 | 86                | 105                 | -                 | -                   | 210          |
| SHALLOW   | south    | SB   | 91           | 94           | 150        | 2      | 96                | 75                  | 126               | 75                  | -                 | -                   | 238          |
|           |          | WB   | 285          | 288          | 200        | 2      | 57                | 40                  | 88                | 160                 | -                 | -                   | 211          |
|           |          | WW   | 285          | 288          | 220        | 3      | 74                | 40                  | 102               | 90                  | 130               | 90                  | 250          |
|           |          | WOSR | 212          | 215          | 210        | 2      | 58                | 105                 | 86                | 105                 | -                 | -                   | 210          |
|           | north    | SB   | 75           | 78           | 150        | 2      | 80                | 75                  | 110               | 75                  | -                 | -                   | 258          |
|           |          | WB   | 285          | 288          | 200        | 2      | 57                | 40                  | 88                | 160                 | -                 | -                   | 211          |
|           |          | WW   | 285          | 288          | 220        | 3      | 84                | 40                  | 112               | 90                  | 140               | 90                  | 270          |
|           |          | WOSR | 212          | 215          | 210        | 2      | 58                | 105                 | 86                | 105                 | -                 | -                   | 210          |
| HUMOSE    | south    | SB   | 91           | 94           | 80         | 2      | 96                | 40                  | 126               | 40                  | -                 | -                   | 238          |
|           |          | WB   | 285          | 288          | 120        | 2      | 87                | 40                  | 88                | 80                  | -                 | -                   | 211          |
|           |          | WW   | 285          | 288          | 140        | 3      | 74                | 40                  | 102               | 50                  | 130               | 50                  | 250          |
|           |          | WOSR | 212          | 215          | 130        | 2      | 58                | 65                  | 86                | 65                  | -                 | -                   | 210          |
|           | north    | SB   | 75           | 78           | 80         | 2      | 80                | 40                  | 110               | 40                  | -                 | -                   | 258          |
|           |          | WB   | 285          | 288          | 120        | 2      | 87                | 40                  | 88                | 80                  | -                 | -                   | 211          |
|           |          | WW   | 285          | 288          | 140        | 3      | 84                | 40                  | 112               | 50                  | 140               | 50                  | 270          |
|           |          | WOSR | 212          | 215          | 130        | 2      | 58                | 65                  | 86                | 65                  | -                 | -                   | 210          |

SB: Spring Barley WB: Winter Barley WW: Winter Wheat WOSR: Winter Oilseed Rape

South - North border is set at 56.64N

SANDS soil type includes soils which are sand, loamy sand or sandy loam to 40 cm depth and are sand or loamy sand between 40 and 80 cm

SALO soil type includes sandy loam and loamy soils

SHALLOW soil type includes soils over impermeable subsoils and those where the parent rock (chalk, limestone or other rock) is within 40 cm of the soil surface

HUMOSE soil type includes soil with 10 and 20% organic matter

OTHER soil type includes all soils that do not fall in any of the other soil types
